# Supplementary material
Source: PubMed Central journal article supplement (PMC8617511)
Supplement: pnas.2106115118.sapp.pdf [file pnas.2106115118.sapp.pdf]

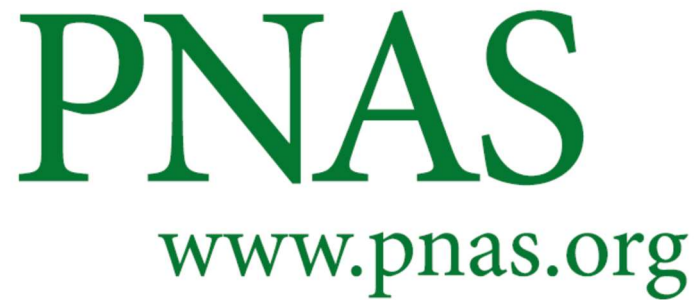

**Supplementary Information for**

Maternal cannabis use is associated with suppression of immune gene networks in placenta and increased anxiety phenotypes in offspring

**Gregory Rompala, PhD<sup>\*1</sup>, Yoko Nomura, PhD<sup>\*2,3,4</sup>, Yasmin Hurd, PhD<sup>1</sup>**

\*GR and YN contributed equally

Yasmin Hurd, PhD.

Email: [Yasmin.Hurd@mssm.edu](mailto:Yasmin.Hurd@mssm.edu)

**This PDF file includes:**

Figures S1 to S5

Tables S1 to S4

Legends for Datasets S1 to S7

**Other supplementary materials for this manuscript include the following:**

Datasets S1 to S7

## Supplementary Figures

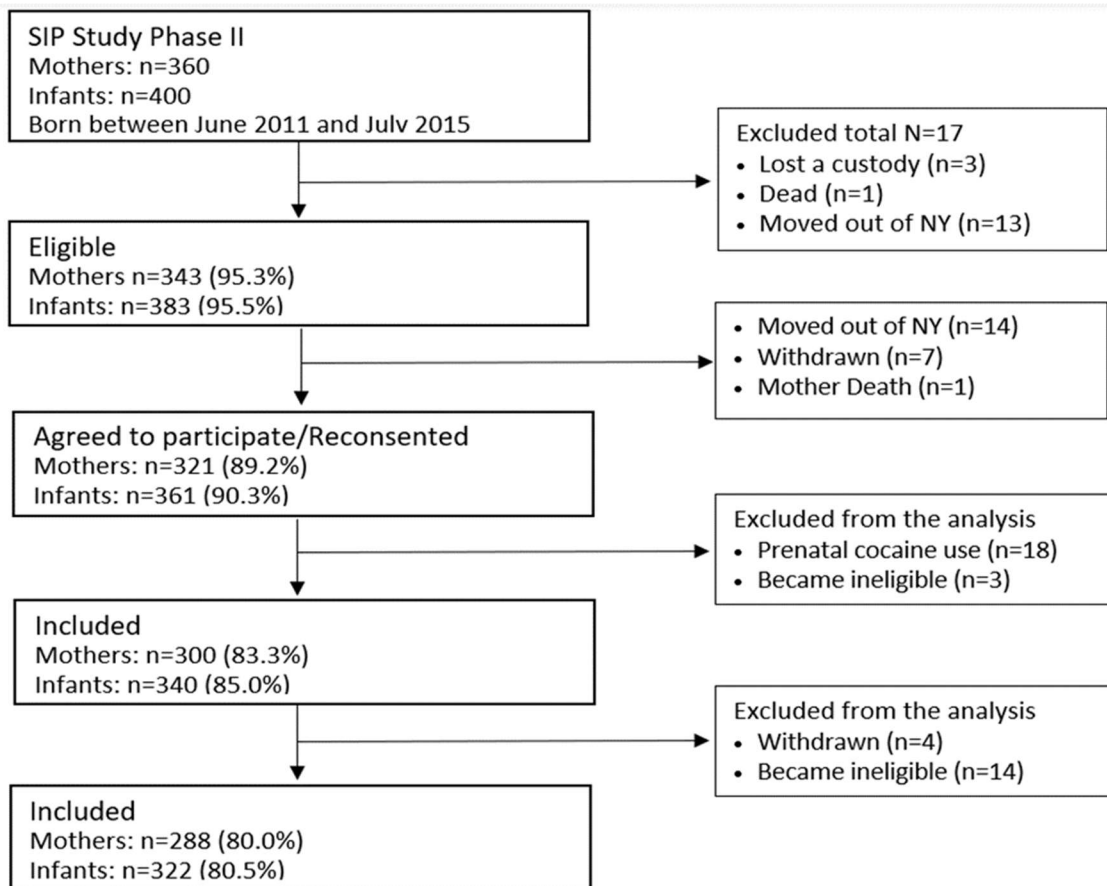

**Figure S1. Consort flow chart.** Diagram showing the participants who met the inclusion/exclusion criteria for the current study.

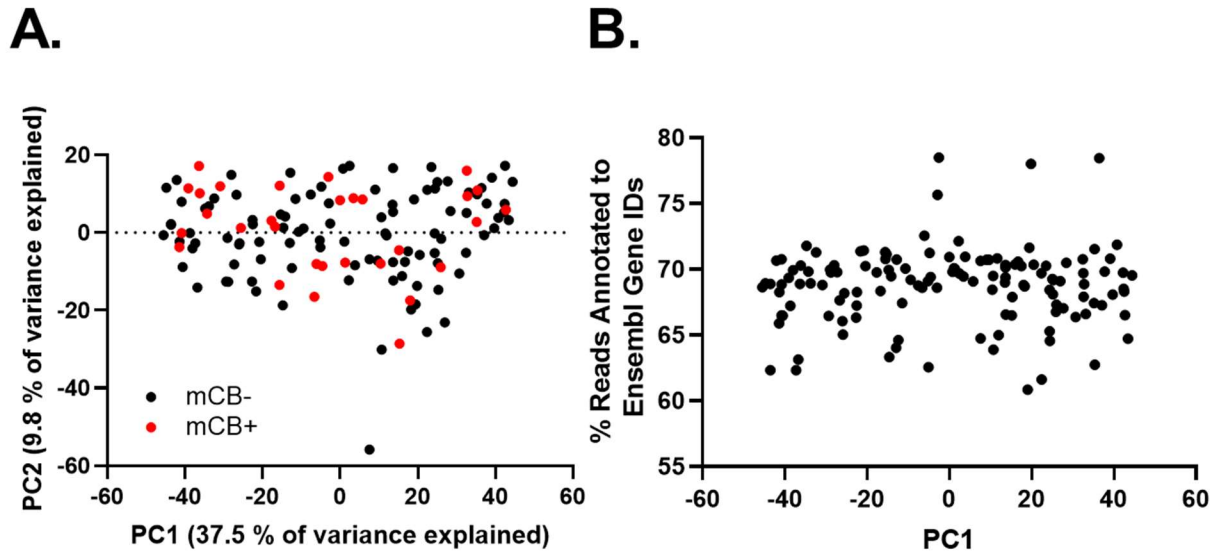

**Figure S2. Principal component (PC) analysis of placenta RNA-seq dataset. (A)** Scatterplot representing the first and second PC for each maternal cannabis use (mCB) and non-maternal cannabis use (mCB-) sample determined from normalized gene expression in placenta. **(B)** Scatter plot showing no relationship between PC1 and gene annotation efficiency.

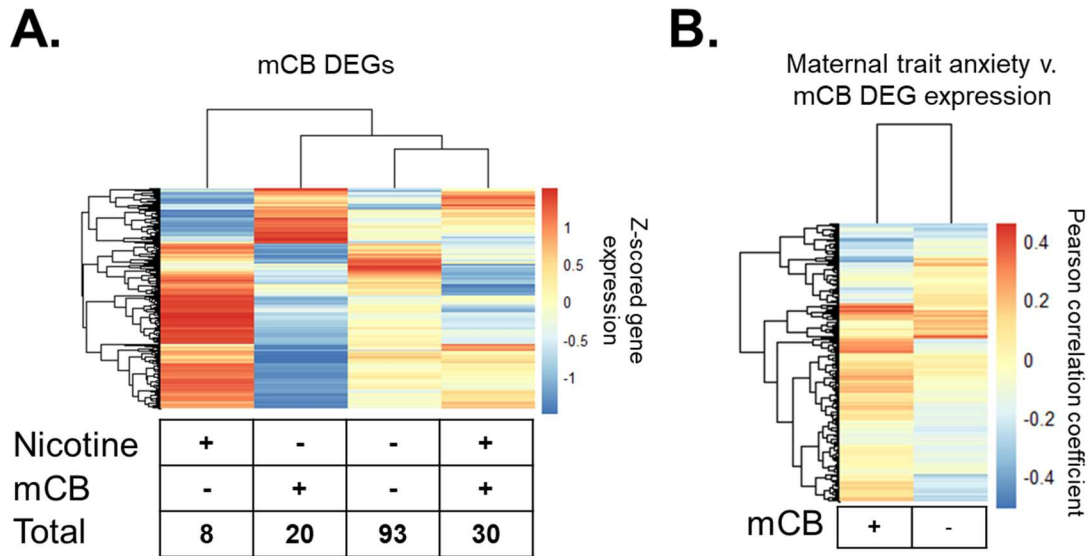

**Figure S3. Evaluating relationship between covariates and placental gene expression**

**associated with maternal cannabis use. (A)** Hierarchical clustering of heatmap

separating mCB-DEGs by maternal cigarette smoking (nicotine) and cannabis use.

Although cigarette smokers were overrepresented in the maternal cannabis use cohort,

the impact of maternal cannabis on DEGs is more pronounced in the subcohort without

cigarette smoking. **(B)** Heatmap showing correlation strength of mCB-DEGs with

maternal trait anxiety scores. While maternal cannabis use was associated with

increased trait anxiety (see Figure 1), the relationship between trait anxiety and mCB

DEGs was distinct between the mCB+ and mCB- populations.

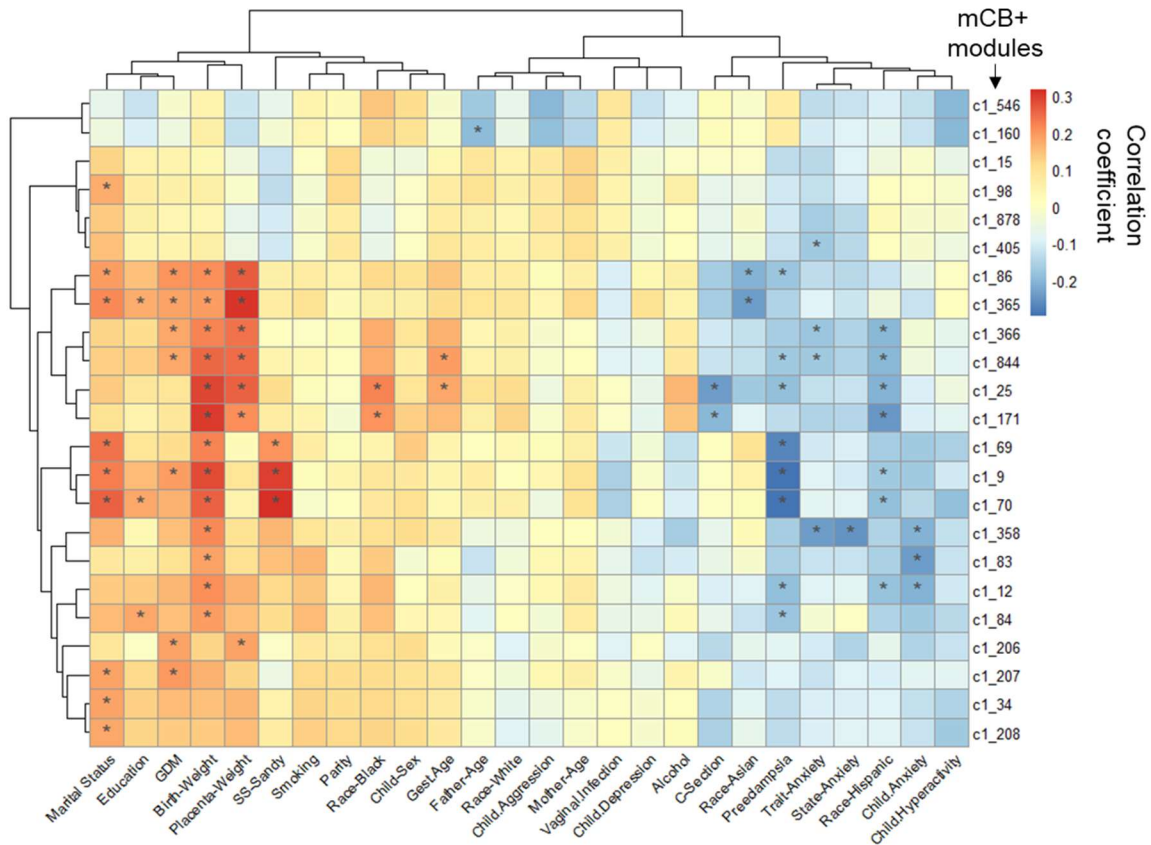

**Figure S4. Relationship between mCB-linked placental gene networks and demographic factors.** Heatmap depicting correlation coefficients between eigengenes for networks enriched with mCB differentially expressed genes and maternal demographic information (also included are the child neurobehavioral traits from Figure 2C). \* =  $p < 0.05$ . Several of the networks enriched for mCB+ DEGs had eigengenes significantly correlated with demographic factors, most prominently birth weight, preeclampsia, and marital status. Of the three modules significantly associated with child anxiety (c1\_358, c1\_83, c1\_12), all three were associated with birth weight with c1\_358 also linked to maternal trait and state anxiety during pregnancy. In addition, the c1\_12 eigengene was correlated with Hispanic race and preeclampsia. Overall, this analysis indicates that, in addition to maternal cannabis use, several prenatal factors may impact immune-related placental

gene expression networks, including those linked with anxiety in young children. Featured dicotomous measures (e.g., 0 or 1): Marital Status (married/common-law), SS-Sandy= pregnancy during Superstorm Sandy, Smoking, Race, Child-Sex = female (0) or male (1). Alcohol = self-reported use during pregnancy, GDM = gestational diabetes mellitus, Preeclampsia, Vaginal Infection, C-section (C-section birth). Continuous measures: Trait-Anxiety, State-Anxiety, Education = educational attainment from 0 (some elementary) to 6 (graduate degree), Birth-Weight, Placenta-Weight, gestational age (Gest-Age), Father-Age, Mother-Age, Parity.

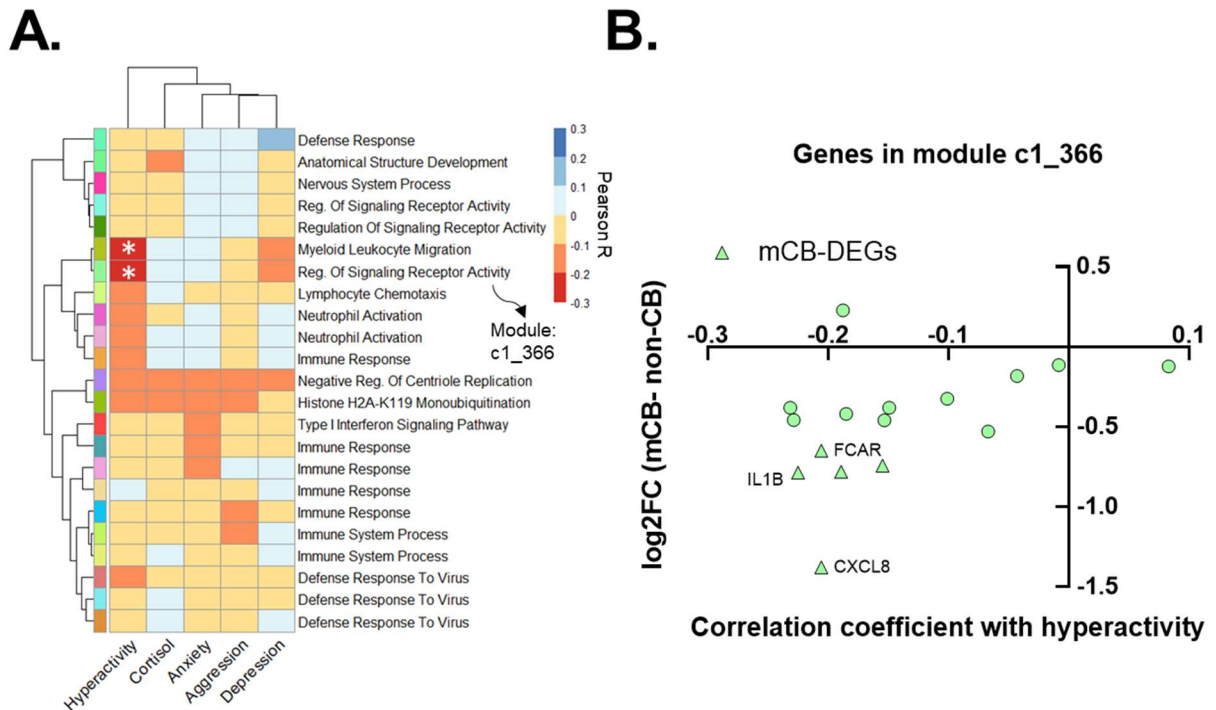

**Figure S5. Relationship between mCB-linked placental gene networks and neurobehavioral trait scores in young children. (A)** Heatmap depicting correlation coefficients between eigengenes for networks enriched with mCB differentially expressed genes (rows) and neurobehavioral traits (columns). \* =  $p < 0.05$ . Each network is labelled with a unique color and its most significant gene ontology term. **(B)** Relationship between the genes in module c1\_366 and hyperactivity levels. Differentially expressed genes for mCB are represented as triangles.

## Supplementary Tables

**Table S1.** Clinically significant neurobehavioral traits in young children with mCB.

| Clinically significant behavioral problems | Non-CB (N=236) |        | mCB (N=68) |        | OR (95% CI)        | pval  | AOR (95% CI)       | pval  |
|--------------------------------------------|----------------|--------|------------|--------|--------------------|-------|--------------------|-------|
|                                            | N              | %total | N          | %total |                    |       |                    |       |
| <b>Aggression</b>                          | 18             | 7.6    | 11         | 16.7   | 2.42 (1.08 – 5.43) | 0.028 | 4.04 (1.31- 12.43) | 0.015 |
| <b>Anxiety</b>                             | 51             | 21.8   | 24         | 36.4   | 2.05 (1.14 – 3.70) | 0.016 | 2.47 (1.13 – 5.43) | 0.024 |
| <b>Attention problem</b>                   | 41             | 17.4   | 18         | 26.9   | 1.74 (0.92 – 3.29) | 0.089 | 1.79 (0.83 – 3.85) | 0.135 |
| <b>Atypicality</b>                         | 39             | 16.6   | 20         | 30.3   | 2.35 (1.26 – 4.37) | 0.006 | 2.11 (1.00 – 4.53) | 0.05  |
| <b>Depression</b>                          | 34             | 14.5   | 16         | 23.9   | 1.85 (0.95 – 3.60) | 0.07  | 1.67 (.71 – 3.94)  | 0.242 |
| <b>Hyperactivity</b>                       | 25             | 10.7   | 13         | 19.1   | 1.98 (0.95 – 4.11) | 0.065 | 2.48 (1.02 – 6.07) | 0.042 |
| <b>Somatization</b>                        | 33             | 14     | 10         | 14.9   | 1.07 (0.50 – 2.31) | 0.855 | 0.51 (0.18 – 1.42) | 0.196 |
| <b>Withdrawal</b>                          | 36             | 15.3   | 12         | 17.6   | 1.19 (0.58 – 2.44) | 0.634 | 0.86 (0.35 – 2.11) | 0.75  |



**Table S2.** Interaction between mCB and child sex for neurobehavioral traits in young children.

|                           | Non-CB |      |         |       | mCB   |       |         |       | mCB x Child Sex           |              |
|---------------------------|--------|------|---------|-------|-------|-------|---------|-------|---------------------------|--------------|
|                           | Males  |      | Females |       | Males |       | Females |       | F-test <sub>(1,296)</sub> | p-value      |
|                           | Mean   | SD   | Mean    | SD    | Mean  | SD    | Mean    | SD    |                           |              |
| <b>Aggression</b>         | 47.47  | 8.41 | 45.76   | 8.3   | 49.25 | 9.47  | 52.25   | 13.45 | 4.96                      | <b>0.027</b> |
| <b>Anxiety</b>            | 49.35  | 10.9 | 52.34   | 10.87 | 54.37 | 11.8  | 56.34   | 13.37 | 0.005                     | 0.942        |
| <b>Attention Problems</b> | 52.2   | 8.26 | 47.82   | 9.3   | 51.88 | 10.75 | 49.84   | 10.29 | 1.201                     | 0.274        |
| <b>Atypicality</b>        | 51.04  | 10.9 | 48.85   | 8.29  | 53.59 | 9.13  | 55.78   | 13.96 | 2.353                     | 0.126        |
| <b>Depression</b>         | 49.24  | 10.3 | 47.85   | 10.07 | 50.41 | 10.8  | 52.81   | 12.1  | 1.87                      | 0.173        |
| <b>Hypeactivity</b>       | 50.22  | 9.22 | 46.77   | 8.83  | 53.41 | 9.33  | 50.59   | 12.08 | 0.165                     | 0.685        |
| <b>Somatization</b>       | 49.5   | 9.61 | 48.98   | 9.07  | 49.41 | 9.69  | 49.16   | 11    | 0.348                     | 0.556        |
| <b>Withdrawal</b>         | 49.42  | 8.86 | 48.86   | 9.01  | 49.69 | 11.02 | 50.5    | 9.913 | 0.34                      | 0.56         |

**Table S3.** Correlation between heart rate variability metrics and neurobehavioral traits in young children.

|                           | Pre-startle |         | Startle |         | Post-startle |         |
|---------------------------|-------------|---------|---------|---------|--------------|---------|
|                           | HF-HRV      | nHF-HRV | HF-HRV  | nHF-HRV | HF-HRV       | nHF-HRV |
| <b>Aggression</b>         | 0.09        | 0.15    | 0.02    | 0.11    | 0.03         | 0.06    |
| <b>Anxiety</b>            | 0.05        | 0.10    | 0.03    | 0.08    | 0.01         | 0.08    |
| <b>Attention Problems</b> | 0.08        | 0.08    | -0.04   | 0.04    | 0.05         | 0.10    |
| <b>Atypicality</b>        | 0.14        | 0.12    | -0.04   | 0.05    | -0.05        | 0.09    |
| <b>Depression</b>         | 0.10        | 0.13    | -0.02   | 0.08    | 0.05         | 0.11    |
| <b>Hyperactivity</b>      | 0.08        | 0.05    | -0.10   | -0.06   | 0.02         | 0.14    |
| <b>Somatization</b>       | -0.01       | -0.01   | -0.02   | -0.03   | -0.06        | 0.01    |
| <b>Withdrawal</b>         | -0.10       | 0.02    | -0.05   | -0.07   | -0.16        | -0.15   |

values= Pearson's coefficient

**Table S4.** Demographics for subset of cohort included in placenta RNA-seq analysis.

| Demographics for RNA-seq         |                      | Non-CB |       | mCB    |        |
|----------------------------------|----------------------|--------|-------|--------|--------|
|                                  |                      | N=101  |       | N=30   |        |
|                                  |                      | Mean   | SD    | Mean   | SD     |
| Maternal Age                     |                      | 27.94  | 0.62  | 25.57  | 1.05   |
| Paternal Age                     |                      | 30.08  | 0.69  | 28.21  | 1.18   |
| Parity                           |                      | 2.74   | 0.21  | 3.83   | 0.62   |
| Gestational Age (weeks)          |                      | 39.13  | 0.23  | 39.32  | 0.37   |
| Birth Weight (g)                 |                      | 3391   | 70.41 | 3195   | 136.1  |
| Placenta Weight (g)              |                      | 657.11 | 166.6 | 578.18 | 110.19 |
| Prenatal Trait Anxiety           |                      | 36.36  | 1.11  | 40.62  | 2.12   |
| Prenatal State Anxiety           |                      | 36.42  | 1.11  | 42.53  | 2.11   |
|                                  |                      | N      |       | N      |        |
| Prenatal Depression              |                      | 31     |       | 11     |        |
| Child Sex: Male                  |                      | 49     |       | 12     |        |
| Child Sex: Female                |                      | 52     |       | 18     |        |
| Marital Status                   | Married              | 46     |       | 5      |        |
|                                  | Common Law           | 7      |       | 5      |        |
|                                  | Single               | 46     |       | 24     |        |
|                                  | Widowed              | 0      |       | 1      |        |
|                                  | Divorced             | 2      |       | 0      |        |
| Race                             | Asian                | 7      |       | 2      |        |
|                                  | Black                | 59     |       | 14     |        |
|                                  | Hispanic             | 19     |       | 11     |        |
|                                  | White                | 11     |       | 2      |        |
|                                  | Other                | 5      |       | 1      |        |
| Educational Attainment           | Less than elementary | 1      |       | 0      |        |
|                                  | Some high school     | 11     |       | 4      |        |
|                                  | High school graduate | 23     |       | 11     |        |
|                                  | Some college         | 34     |       | 7      |        |
|                                  | Associate Degree     | 17     |       | 5      |        |
|                                  | Bachelor's Degree    | 6      |       | 3      |        |
| Graduate Degree                  |                      | 3      |       | 0      |        |
| Prenatal Alcohol Use             |                      | 7      |       | 3      |        |
| Prenatal Cigarette Smoking       |                      | 8      |       | 10     |        |
| Pregnant during Superstorm Sandy |                      | 32     |       | 6      |        |
| C-section                        |                      | 34     |       | 8      |        |
| Vaginal Infection                |                      | 35     |       | 11     |        |
| Preeclampsia                     |                      | 13     |       | 7      |        |
| Gestational Diabetes             |                      | 12     |       | 3      |        |

## **Legend for Supplementary Datasets.**

**Dataset S1.** RNA-sequencing quality control metrics.

**Dataset S2.** Differential expression analysis for placenta RNA-seq dataset.

**Dataset S3.** Gene ontology analysis for mCB differentially expressed genes.

**Dataset S4.** Reference list of placental cell-type marker genes.

**Dataset S5.** Placenta gene co-expression modules with gene-module assignments and hub genes.

**Dataset S6.** Placenta gene co-expression networks and eigengene relationships with neurobehavioral traits in young children as well as with cohort demographics.

**Dataset S7.** Examining the differentially expressed genes in co-expression networks associated with neurobehavioral traits in young children.
